# Supplementary material for: Combined Blockade of TIGIT and CD39 or A2AR Enhances NK-92 Cell-Mediated Cytotoxicity in AML
Source: Int J Mol Sci. 2021 Nov 29;22(23):12919. doi: 10.3390/ijms222312919 (PMC8657570; doi:10.3390/ijms222312919)
Supplement: Supplementary file 1 [file ijms-22-12919-s001.zip › ijms-1453117-supplementary.pdf]

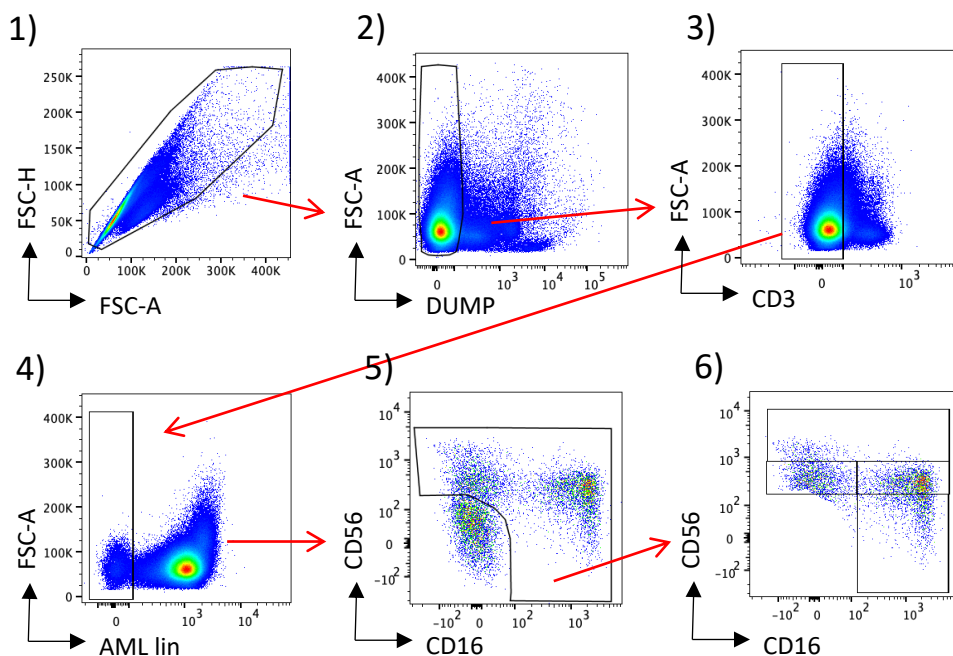

### Supplementary Materials Figure S1. Gating strategy

Gating strategy used to identify  $CD56^+CD16^+$  natural killer (NK) cells and their  $CD56^{bright}CD16^-$ ,  $CD56^{dim}CD16^-$ ,  $CD56^{dim}CD16^+$ ,  $CD56-CD16^+$  subpopulations from the bone marrow (BM) and peripheral blood (PB). The same gating strategy was used to analyze samples from PB and BM: after elimination of doublets (1) and exclusion of cell debris, B cells and monocytes/macrophages via the *DUMP* channel (2), the T cells were defined as  $CD3^+$  (3). Next, AML cells were identified on the basis of their expression of CD117, CD34, and CD33 on the  $CD3^+$  cell subset (4). Using CD56 and CD16, NK cells were identified within the remaining cells (5). Within this population, NK cell subpopulations were defined on the basis of the co-expression pattern of CD56 and CD16 (6).

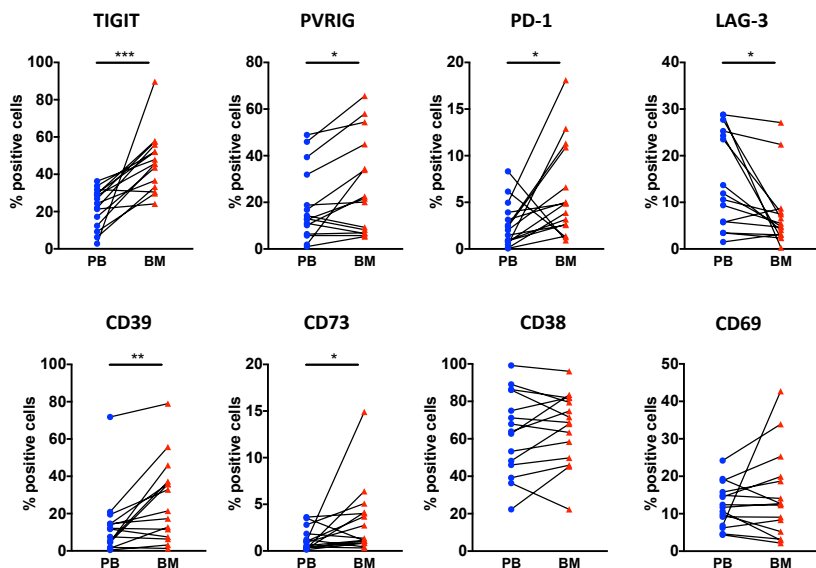

### Supplementary Materials Figure S2. Checkpoint expression on NK cells in corresponding PB- and BM-derived aspirates of AML patients

The surface expression of TIGIT, PVRIG, PD-1, LAG-3, CD39, CD73, CD38, and CD69 was analyzed on NK cells derived from the peripheral blood (PB) and corresponding bone marrow (BM) from patients with newly diagnosed AML (n=15).

Summary data illustrating the frequency of positive cells on paired PB- and BM-derived NK cells in AML. P values were obtained by the Wilcoxon test. \* $P < 0.05$ , \*\* $P < 0.01$ , \*\*\* $P < 0.001$ .

**A**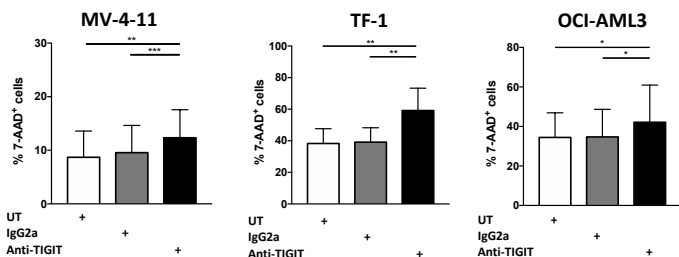**B**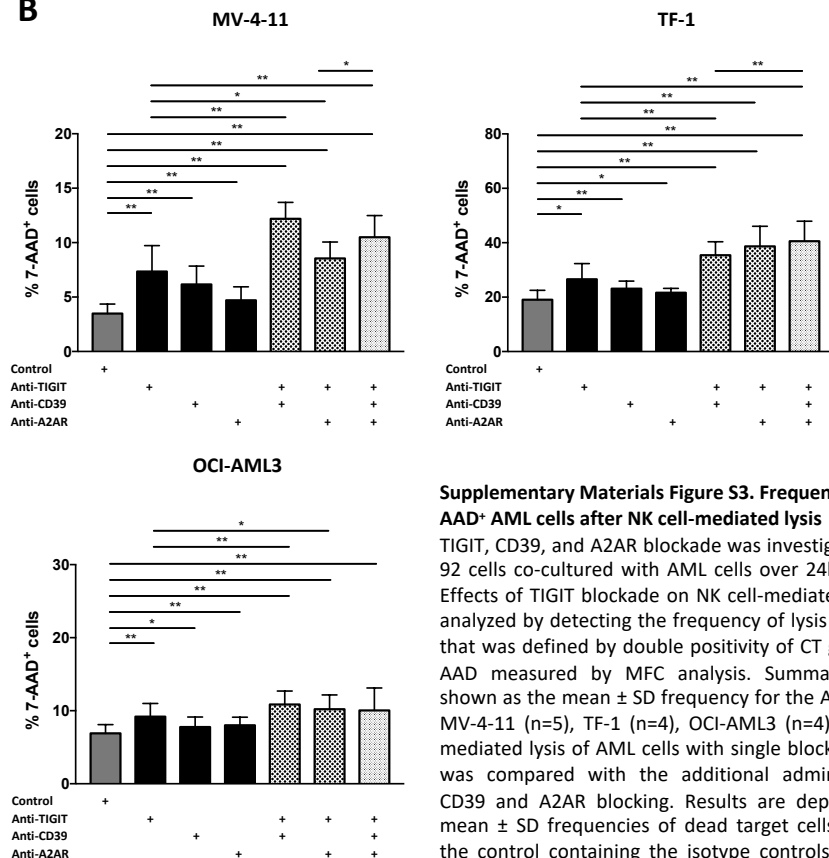

### Supplementary Materials Figure S3. Frequencies of 7-AAD<sup>+</sup> AML cells after NK cell-mediated lysis

TIGIT, CD39, and A2AR blockade was investigated for NK-92 cells co-cultured with AML cells over 24h *in vitro*. **A)** Effects of TIGIT blockade on NK cell-mediated lysis were analyzed by detecting the frequency of lysis of AML cells that was defined by double positivity of CT green and 7-AAD measured by MFC analysis. Summary data are shown as the mean  $\pm$  SD frequency for the AML cell lines MV-4-11 (n=5), TF-1 (n=4), OCI-AML3 (n=4). **B)** NK cell-mediated lysis of AML cells with single blockade of TIGIT was compared with the additional administration of CD39 and A2AR blocking. Results are depicted as the mean  $\pm$  SD frequencies of dead target cells, relative to the control containing the isotype controls and DMSO. MV-4-11 (n=3), TF-1 (n=3), OCI-AML3 (n=3). All measurements were performed in technical triplicates. P values were obtained by the Wilcoxon test. \*P<0.05, \*\*P<0.01, \*\*\*P<0.001.

| p-value                | Anti-TIGIT                 | Anti-CD39                  | Anti-A2AR                  | Anti-TIGIT + Anti-CD39     | Anti-TIGIT + Anti-A2AR     | Anti-TIGIT + Anti-CD39 + Anti-A2AR |
|------------------------|----------------------------|----------------------------|----------------------------|----------------------------|----------------------------|------------------------------------|
| Control                | 0.0039<br>0.0078<br>0.0039 | 0.0039<br>0.0039<br>0.0039 | 0.0039<br>0.0195<br>0.0039 | 0.0039<br>0.0039<br>0.0039 | 0.0039<br>0.0039<br>0.0039 | 0.0039<br>0.0039<br>0.0039         |
| Anti-TIGIT             | -                          | -                          | -                          | 0.0039<br>0.0039<br>0.0039 | 0.0195<br>0.0039<br>n.s.   | 0.0078<br>0.0039<br>n.s.           |
| Anti-TIGIT + Anti-CD39 | -                          | -                          | -                          | -                          | -                          | 0.0039<br>0.0078<br>n.s.           |
| Anti-TIGIT + Anti-A2AR | -                          | -                          | -                          | -                          | -                          | 0.0195<br>n.s.<br>n.s.             |

- MV-4-11
- TF-1
- OCI-AML3

- : not analyzed

### Supplementary Materials Table S1. P-values for the differences in the fold change of 7-AAD<sup>+</sup> AML cells

This table gives further information about the p-values for the significant differences in the fold change of 7-AAD<sup>+</sup> AML cells (MV-4-11 (orange), TF-1 (green), and OCI-AML3 (blue)) between the various checkpoint blockades relatively to the control, depicted in **Figure 5C**. P-values smaller than 0.05 were considered significant.

| p-value                | Anti-TIGIT                 | Anti-CD39                  | Anti-A2AR                  | Anti-TIGIT + Anti-CD39     | Anti-TIGIT + Anti-A2AR     | Anti-TIGIT + Anti-CD39 + Anti-A2AR |
|------------------------|----------------------------|----------------------------|----------------------------|----------------------------|----------------------------|------------------------------------|
| Control                | 0.0039<br>0.0117<br>0.0039 | 0.0039<br>0.0039<br>0.0117 | 0.0039<br>0.0391<br>0.0039 | 0.0039<br>0.0039<br>0.0039 | 0.0039<br>0.0039<br>0.0039 | 0.0039<br>0.0039<br>0.0039         |
| Anti-TIGIT             | -                          | -                          | -                          | 0.0039<br>0.0039<br>0.0039 | 0.0195<br>0.0039<br>0.0391 | 0.0078<br>0.0039<br>n.s.           |
| Anti-TIGIT + Anti-CD39 | -                          | -                          | -                          | -                          | -                          | 0.0039<br>0.0078<br>n.s.           |
| Anti-TIGIT + Anti-A2AR | -                          | -                          | -                          | -                          | -                          | 0.0117<br>n.s.<br>n.s.             |

- MV-4-11
- TF-1
- OCI-AML3

- : not analyzed

### Supplementary Materials Table S2. P-values for the differences in the frequency of 7-AAD<sup>+</sup> AML cells

This table shows the p-values for the significant differences in the frequency (%) of 7-AAD<sup>+</sup> AML cells (MV-4-11 (orange), TF-1 (green), and OCI-AML3 (blue)) between the various checkpoint blockades or the control, depicted in **Supplementary Materials Figure S3B**. P-values smaller than 0.05 were considered significant.

| Patients for protein analyses | AML<br>N <sub>total</sub> = 25    | HD<br>N <sub>total</sub> = 12 |
|-------------------------------|-----------------------------------|-------------------------------|
| Age                           |                                   |                               |
| median                        | 66.0 (25-84)                      | 59.0 (41-70)                  |
| Sex                           |                                   |                               |
| female                        | 13 (52%)                          | 6 (50%)                       |
| male                          | 12 (48%)                          | 6 (50%)                       |
| <b>FAB*</b>                   | <b>N<sub>total</sub> = 25 (%)</b> |                               |
| M0                            | 1 (4)                             |                               |
| M1                            | 10 (40)                           |                               |
| M2                            | 5 (20)                            |                               |
| M3                            | 0 (0)                             |                               |
| M4/M4Eo                       | 5 (20)                            |                               |
| M5                            | 3 (12)                            |                               |
| M6                            | 0 (0)                             |                               |
| sAML: tAML                    | 1 (4)                             |                               |
| <b>ELN*</b>                   | <b>N<sub>total</sub> = 25 (%)</b> |                               |
| favorable                     | 9 (36)                            |                               |
| intermediate                  | 8 (32)                            |                               |
| adverse                       | 8 (32)                            |                               |
| <b>Molecular genetic*</b>     | <b>N<sub>total</sub> = 25 (%)</b> |                               |
| FLT 3 ITD                     | 9 (36)                            |                               |
| FLT 3 TKD                     | 4 (16)                            |                               |
| NPM1 mut                      | 10 (40)                           |                               |
| DNMT3A mut**                  | 11 (44)                           |                               |

\*Data of 1 patient unknown

\*\*Data of 6 patients unknown

### Supplementary Materials Table S3. Patient characteristics

Age, sex, French American British classification (FAB), European LeukemiaNet classification (ELN) and the molecular aberrations: FMS like tyrosine kinase 3 internal tandem duplication or the tyrosine kinase domain mutation (FLT3 ITD or FLT 3 TKD), nucleophosmin 1 mutation (NPM1) and the DNA (cytosine-5)-methyltransferase 3A mutation (DNMT3A) of the donors who donated bone marrow (BM) aspirates or peripheral blood (PB) specimens are depicted in Table S3.
